# Supplementary material
Source: MDPI journal article supplement (https://www.mdpi.com/2077-0472/13/8/1477)
Supplement: s1 [file s1]

## Supplementary material

**Table S1.** List of pre-processing methods for hyperspectral data of *B. juncea* plants.

| 1st pre-processing         | 2nd pre-processing    | 3rd pre-processing | Abbreviation                |
|----------------------------|-----------------------|--------------------|-----------------------------|
| Raw reflectance            | None                  | None               | Raw reflectance             |
|                            |                       | SNV                | SNV                         |
|                            |                       | MSC                | MSC                         |
|                            | Savitzky–Golay filter | None               | SG filter                   |
|                            |                       | SNV                | SG filter + SNV             |
|                            |                       | MSC                | SG filter + MSC             |
|                            | 1st derivative        | None               | 1st Der                     |
|                            |                       | SNV                | 1st Der + SNV               |
|                            |                       | MSC                | 1st Der + MSC               |
|                            | 2nd derivative        | None               | 2nd Der                     |
|                            |                       | SNV                | 2nd Der + SNV               |
|                            |                       | MSC                | 2nd Der + MSC               |
| Normalization              | None                  | None               | Norm                        |
|                            |                       | SNV                | Norm + SNV                  |
|                            |                       | MSC                | Norm + MSC                  |
|                            | Savitzky–Golay filter | None               | Norm + SG filter            |
|                            |                       | SNV                | Norm + SG filter + SNV      |
|                            |                       | MSC                | Norm + SG filter + MSC      |
|                            | 1st derivative        | None               | Norm + 1st Der              |
|                            |                       | SNV                | Norm + 1st Der + SNV        |
|                            |                       | MSC                | Norm + 1st Der + MSC        |
|                            | 2nd derivative        | None               | Norm + 2nd Der              |
|                            |                       | SNV                | Norm + 2nd Der + SNV        |
|                            |                       | MSC                | Norm + 2nd Der + MSC        |
| Logarithmic transformation | None                  | None               | Log (1/R)                   |
|                            |                       | SNV                | Log (1/R) + SNV             |
|                            |                       | MSC                | Log (1/R) + MSC             |
|                            | Savitzky–Golay filter | None               | Log (1/R) + SG filter       |
|                            |                       | SNV                | Log (1/R) + SG filter + SNV |
|                            |                       | MSC                | Log (1/R) + SG filter + MSC |
|                            | 1st derivative        | None               | Log (1/R) + 1st Der         |
|                            |                       | SNV                | Log (1/R) + 1st Der + SNV   |
|                            |                       | MSC                | Log (1/R) + 1st Der + MSC   |
|                            | 2nd derivative        | None               | Log (1/R) + 2nd Der         |
|                            |                       | SNV                | Log (1/R) + 2nd Der + SNV   |
|                            |                       | MSC                | Log (1/R) + 2nd Der + MSC   |

SNV, standard normal variate; MSC, multiplicative scatter correction

**Table S2.** Determination of pre-processing methods for Adaboost, XGboost, and LightGBM prediction algorithms for five metabolites in *B. juncea* plants.

| Metabolite     | Prediction algorithms | Pre-processing method            | Calibration  |              | Cross-validation |              |
|----------------|-----------------------|----------------------------------|--------------|--------------|------------------|--------------|
|                |                       |                                  | $R^2_c$      | RMSEC        | $R^2_{cv}$       | RMSECV       |
| Chlorophylls   | Adaboost              | <b>Log (1/R) + 2nd Der + MSC</b> | <b>0.934</b> | <b>0.593</b> | <b>0.425</b>     | <b>1.750</b> |
|                |                       | 1st Der                          | 0.921        | 0.648        | 0.420            | 1.757        |
|                |                       | Log (1/R) + 1st Der              | 0.933        | 0.595        | 0.404            | 1.782        |
|                |                       | Log (1/R) + 2nd Der              | 0.929        | 0.614        | 0.388            | 1.805        |
|                |                       | Log (1/R) + 2nd Der + SNV        | 0.934        | 0.594        | 0.386            | 1.808        |
|                | XGboost               | <b>Log (1/R) + 2nd Der + MSC</b> | <b>1.000</b> | <b>0.000</b> | <b>0.449</b>     | <b>1.713</b> |
|                |                       | 1st Der                          | 1.000        | 0.000        | 0.430            | 1.742        |
|                |                       | Log (1/R) + 2nd Der + SNV        | 1.000        | 0.000        | 0.412            | 1.770        |
|                |                       | Log (1/R) + 2nd Der              | 1.000        | 0.000        | 0.401            | 1.785        |
|                |                       | Norm + MSC                       | 1.000        | 0.001        | 0.391            | 1.800        |
|                | LightGBM              | <b>1st Der</b>                   | <b>0.945</b> | <b>0.539</b> | <b>0.402</b>     | <b>1.783</b> |
|                |                       | Log (1/R)                        | 0.830        | 0.950        | 0.382            | 1.814        |
|                |                       | Log (1/R) + 1st Der + SNV        | 0.942        | 0.553        | 0.375            | 1.823        |
|                |                       | Log (1/R) + 2nd Der              | 0.969        | 0.403        | 0.361            | 1.844        |
|                |                       | Log (1/R) + 2nd Der + SNV        | 0.967        | 0.422        | 0.346            | 1.866        |
| Phenolics      | Adaboost              | <b>Norm</b>                      | <b>0.924</b> | <b>0.642</b> | <b>0.581</b>     | <b>1.505</b> |
|                |                       | Norm + MSC                       | 0.913        | 0.687        | 0.540            | 1.576        |
|                |                       | Log (1/R) + 1st Der + MSC        | 0.937        | 0.581        | 0.537            | 1.582        |
|                |                       | 1st Der + MSC                    | 0.934        | 0.598        | 0.536            | 1.584        |
|                |                       | Norm + 1st Der                   | 0.937        | 0.582        | 0.528            | 1.597        |
|                | XGboost               | <b>Norm + SG filter</b>          | <b>1.000</b> | <b>0.001</b> | <b>0.574</b>     | <b>1.516</b> |
|                |                       | Log (1/R) + 1st Der + MSC        | 1.000        | 0.000        | 0.560            | 1.541        |
|                |                       | SNV                              | 1.000        | 0.001        | 0.555            | 1.551        |
|                |                       | Norm + SNV                       | 1.000        | 0.001        | 0.555            | 1.551        |
|                |                       | Norm + MSC                       | 1.000        | 0.000        | 0.552            | 1.555        |
|                | LightGBM              | <b>1st Der</b>                   | <b>0.951</b> | <b>0.515</b> | <b>0.522</b>     | <b>1.607</b> |
|                |                       | Log (1/R) + SG filter + MSC      | 0.902        | 0.726        | 0.502            | 1.639        |
|                |                       | Norm + 2nd Der                   | 0.974        | 0.378        | 0.502            | 1.639        |
|                |                       | SG filter + SNV                  | 0.916        | 0.675        | 0.499            | 1.645        |
|                |                       | Norm + SG filter + SNV           | 0.916        | 0.675        | 0.499            | 1.645        |
| Flavonoids     | Adaboost              | <b>2nd Der</b>                   | <b>0.924</b> | <b>0.676</b> | <b>0.467</b>     | <b>1.789</b> |
|                |                       | Raw reflectance                  | 0.842        | 0.974        | 0.446            | 1.824        |
|                |                       | Log (1/R)                        | 0.838        | 0.986        | 0.441            | 1.832        |
|                |                       | 1st Der                          | 0.927        | 0.663        | 0.435            | 1.842        |
|                |                       | Log (1/R) + 1st Der + SNV        | 0.919        | 0.696        | 0.433            | 1.846        |
|                | XGboost               | <b>1st Der</b>                   | <b>1.000</b> | <b>0.000</b> | <b>0.521</b>     | <b>1.696</b> |
|                |                       | Norm + SG filter + MSC           | 1.000        | 0.001        | 0.508            | 1.719        |
|                |                       | 2nd Der                          | 1.000        | 0.000        | 0.493            | 1.744        |
|                |                       | SG filter + SNV                  | 1.000        | 0.001        | 0.464            | 1.793        |
|                |                       | Norm + SG filter + SNV           | 1.000        | 0.001        | 0.464            | 1.793        |
|                | LightGBM              | <b>1st Der</b>                   | <b>0.930</b> | <b>0.650</b> | <b>0.480</b>     | <b>1.766</b> |
|                |                       | MSC                              | 0.910        | 0.735        | 0.445            | 1.825        |
|                |                       | Norm + SNV                       | 0.909        | 0.740        | 0.443            | 1.829        |
|                |                       | SNV                              | 0.909        | 0.740        | 0.443            | 1.829        |
|                |                       | Norm + MSC                       | 0.907        | 0.748        | 0.439            | 1.835        |
| Glucosinolates | Adaboost              | <b>SNV</b>                       | <b>0.935</b> | <b>2.868</b> | <b>0.666</b>     | <b>6.481</b> |
|                |                       | Norm + SNV                       | 0.935        | 2.868        | 0.666            | 6.481        |
|                |                       | SG filter + SNV                  | 0.929        | 2.996        | 0.657            | 6.572        |

|              |          |                                  |              |              |              |              |
|--------------|----------|----------------------------------|--------------|--------------|--------------|--------------|
| Anthocyanins | XGboost  | Norm + SG filter + SNV           | 0.929        | 2.996        | 0.657        | 6.572        |
|              |          | SG filter                        | 0.913        | 3.317        | 0.653        | 6.605        |
|              |          | <b>SG filter + SNV</b>           | <b>1.000</b> | <b>0.001</b> | <b>0.667</b> | <b>6.473</b> |
|              |          | Norm + SG filter + SNV           | 1.000        | 0.001        | 0.667        | 6.473        |
|              |          | SNV                              | 1.000        | 0.001        | 0.660        | 6.543        |
|              |          | Norm + SNV                       | 1.000        | 0.001        | 0.660        | 6.543        |
|              |          | 1st Der                          | 1.000        | 0.000        | 0.649        | 6.648        |
|              |          | <b>Log (1/R) + 1st Der + SNV</b> | <b>0.972</b> | <b>1.883</b> | <b>0.672</b> | <b>6.420</b> |
|              |          | 1st Der                          | 0.964        | 2.114        | 0.663        | 6.512        |
|              |          | Log (1/R) + 1st Der + MSC        | 0.974        | 1.805        | 0.659        | 6.550        |
|              | LightGBM | 2nd Der                          | 0.983        | 1.443        | 0.658        | 6.561        |
|              |          | SG filter                        | 0.910        | 3.363        | 0.657        | 6.568        |
|              |          | <b>Log (1/R) + 1st Der + MSC</b> | <b>0.972</b> | <b>0.930</b> | <b>0.822</b> | <b>2.330</b> |
|              |          | Log (1/R) + SG filter + SNV      | 0.971        | 0.932        | 0.734        | 2.843        |
|              |          | Norm + 1st Der + SNV             | 0.976        | 0.850        | 0.708        | 2.980        |
|              |          | 1st Der + SNV                    | 0.976        | 0.850        | 0.708        | 2.980        |
|              |          | Norm + 1st Der                   | 0.973        | 0.903        | 0.704        | 3.003        |
|              |          | <b>1st Der</b>                   | <b>1.000</b> | <b>0.000</b> | <b>0.720</b> | <b>2.920</b> |
|              |          | Norm + 1st Der + SNV             | 1.000        | 0.000        | 0.701        | 3.014        |
|              |          | 1st Der + SNV                    | 1.000        | 0.000        | 0.701        | 3.014        |
|              |          | 2nd Der                          | 1.000        | 0.000        | 0.665        | 3.194        |
|              |          | 1st Der + MSC                    | 1.000        | 0.000        | 0.643        | 3.296        |
|              | LightGBM | <b>Log (1/R) + 1st Der</b>       | <b>0.901</b> | <b>1.733</b> | <b>0.688</b> | <b>3.081</b> |
|              |          | 1st Der + SNV                    | 0.900        | 1.746        | 0.679        | 3.125        |
|              |          | Norm + 1st Der + SNV             | 0.900        | 1.746        | 0.679        | 3.125        |
|              |          | Norm + 1st Der                   | 0.903        | 1.717        | 0.673        | 3.153        |
|              |          | Norm + 1st Der + MSC             | 0.904        | 1.713        | 0.661        | 3.214        |

Only the top five pre-processing methods out of 36 methods for each metabolite and prediction algorithm are shown. Bold indicates the pre-processing methods determined with the lowest RMSECV.
